# Supplementary material
Source: PubMed Central journal article supplement (PMC4269497)

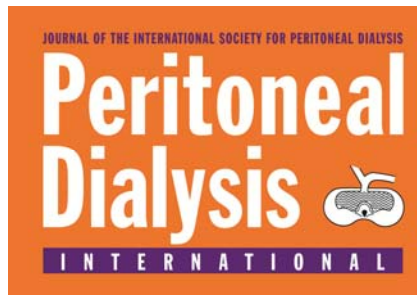

## Supplemental Materials for

### Characterization of the BRAZPD II cohort and description of trends in peritoneal dialysis outcome across time periods

Thyago Proença de Moraes<sup>1</sup>, MD; Ana Elizabeth Figueiredo<sup>2</sup> RN, PhD; Ludimila Guedim de Campos<sup>1</sup>, Marcia Olandoski<sup>1</sup>; Pasqual Barretti<sup>3</sup>, MD, PhD; Roberto Pecoits-Filho<sup>1</sup> M.D, PhD on behalf of the BRAZPD Investigators.

#### Acknowledgements:

This work was partially presented in abstract form at the ISPD Congress in Malaysia, 2012. We thank the Brazilian Baxter Healthcare Renal Team and the previous Study Management team and Steering Committee for important contributions to the creation and development of this project. We would also like to acknowledge the following participating centers: CDTR-Centro Diálise Transplante Renal S/C, Instituto Hemodiálise de Sorocaba, Famesp - Botucatu, Conjunto Hospitalar de Sorocaba, Instituto Nefrologia de Mogi Das Cruzes, Histocom Sociedade Civil Ltda, Instituto Nefrologia Souza e Costa, Hospital Cidade Passo Fundo, CDR - Curitiba, Instituto Nefrologia de Suzano, Nephron - Soc. Benef. Port. de Pelotas, Santa Casa de São José Dos Campos, Unidade Nefrologia Assis, FUNCAMP Fund Desenvolvimento Unicamp, Clínica

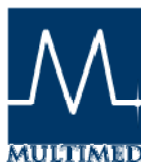

Evangélico S/C Ltda, Nefroclínica Foz Do Iguaçu, Clínica Renal Manaus, Clínica Senhor do Bonfim, Instituto do Rim do Paraná S/C Ltda, Clínica Senhor do Bonfim Ltda, Clire Clínica Doenças Renais, Hosp. Univ. Prof. Edgard Santos, Centro Tratamento Doenças Renais - Joinville, Hospital São Vicente de Paula, Instituto do Rim de Fortaleza, NEFRON Clínica - Natal, Beneficência Portuguesa de Pernambuco, NEPHRON - São Paulo, Hospital Universitário Presidente Dutra Maranhão, Ameneg - Guarulhos, Fundação Apoio Desenvolvimento UFPE/FADE, Clínica Paulista Nefrologia, Medserv, Santa Casa de Santo Amaro, IAMSPE, UNTR - Unidade Nefrologia Transplante São Paulo, Clínica Nefrologia Santa Rita, Serviço De Nefrologia de Ribeirão Preto, Instituto do Rim de Marília, Santa Casa de Marília, Santa Casa de Adamantina, Santa Casa de Votuporanga, Instituto Urologia e Nefrologia São José Rio Preto, Associação Hospitalar de Bauru - Hosp. Base 7.Reg, Fundação Apoio Ensino Pesquisa H.C. FMRP USP, Santa Casa de Ourinhos, Unicom, GDF - Hospital Regional Gama, GDF - Hospital Regional Sobradinho, GDF- Hospital De Base, Instituto Capixaba Doenças Renais, Hospital Evangélico Vila Velha, Fundação Educacional Serra dos Órgaos, Centro Integrado Nefrologia Diálise-VA, Instituto Urologia e Nefrologia Barra Mansa, Renalcor - Rio De Janeiro, Pró-Rim - Campos dos Goitacazes, Pro-Nephron, Inst. Medicina Nuclear Endocrinologia, Hospital Universitário Antônio Pedro, Hospital Servidor do Estado - IPASE, Hospital Geral Bonsucesso, UERJ - Hosp. Clin. Univ. Est. Rio de Janeiro, Gamen - Rio de Janeiro, Clinef - Rio de Janeiro, Clínica Nefrológica - São Gonçalo, Hospital São João Deus-Fund. Geraldo Corrêa, Renalclin - Clínica Doenças Renais, Serviço Ubaense Nefrologia, Santa Casa de Lavras, Biocor Hospital Doenças Cardiológicas, Centro Nefrológico Minas Gerais, Nefron - Contagem, Núcleo Nefrologia Belo Horizonte, Clínica Nefrologia de Franca, Nefrocentro, Hospital São José do Avaí, Pró-Renal SC Ltda. - Barbacena, CDR - Goiânia, CDR - Imperatriz, Fundação Instituto



Mineiro Estudo Pesquisa Nefrol, Clinese, Hospital Vita Volta Redonda S/A, Nefroclinica Caxias do Sul, Santa Casa de Jaú, Fundação Faculdade Medicina-Sp, Clines Clin. Int. Nefrológica de Santos, Hospital Geral de Goiânia, Renalcor - Angra dos Reis, Centro Trat. Doenças Renais - Juiz de Fora, Hospital e Maternidade Angelina Caron, Clinepa Clínica De Nefrologia da Paraíba, Renal Care Prevenção e Tratamento Ltda, Centro Terapia Dialítica - Franca, Núcleo de Medicina Especializada S/C, Instituto Capixaba Doenças Renais -Serra, Nefrosul - Varginha, Instituto Capixaba Doenças Renais -Cariacica, Centro Tratamento Renal Zona Sul, Unirim Unidade Renal do Portão, Instituto do Rim Santo Antônio da Platina, Rien - Rio De Janeiro, Uni Rim - João Pessoa, Unirim Unidade de Doenças Renais Ltda, Casa de Saúde Perpétuo Socorro, Clínica do Rim do Carpina, Hospital São Jorge, Renalvida , Funcamp Fund Desenv.Unicamp - Infantil, Hospital São Vicente de Paulo, Nefroclínica Uberlandia, Hospital Clínica Univ.Fed.Goiânia, CDR - São José Dos Pinhais, Cenec - Centro Nefrológico Cuiab Ltda, Renalcare Serviços Médicos Ltda., PUC - Porto Alegre - Hospital São Lucas, IDR - Porto Alegre, Centro Nefrológico Formiguense, Clínica Santo Antônio de Doenças Renais, Fundação Para o Desenvolvimento Médico e Hospitalar Famesp, CNTT - Clínica Nefrologia e Transplante, Hospital Regional do Vale do Paraíba.



Supplement: supp_2013.00282_Supplemental_Materials.pdf [file supp_2013.00282_Supplemental_Materials.pdf]
